# Supplementary material for: Preparation of cysteamine-modified cellulose nanocrystal adsorbent for removal of mercury ions from aqueous solutions
Source: Springer Nature journal article supplement (doi:10.1007/s10570-019-02420-1), 2019-04-15
Supplement: MOESM1 [file 16661208]

Supplementary material

**Preparation of cysteamine-modified cellulose nanocrystal adsorbent for removal of mercury ions from aqueous solutions**

**Weixue Li, Benzhi Ju** ***, Shufen Zhang**

*State Key Laboratory of Fine Chemicals, Dalian University of Technology, Dalian 116024, PR China*

Corresponding author. Tel.: +86 411 84986269; fax: +86 411 84986264.

E-mail: [jubenzhi@dlut.edu.cn](mailto:jubenzhi@dlut.edu.cn) (B. Ju).

**Experimental**

Characterization

The morphology of CNCs, DAC nanocrystals and Cys-CNCs was analyzed by scanning electron microscopy (SEM), on a Hitachi FESEM SU8220 system (Hitachi Corp., Tokyo, Japan). Energy dispersive X-ray (EDX) spectroscopy was conducted using an EDX analyzer (Horiba Ltd., Kyoto, Japan). X-ray diffraction (XRD) measurements were performed on a SmartLab 9KW diffractometer (Rigaku Corp., Tokyo, Japan). FT-IR spectra of samples were recorded over the range 4000 to 400 cm-1 on a Thermo Scientific Nicolet 6700 FT-IR spectrometer (ThermoFisher Scientific, Waltham, MA, USA). X-ray photoelectron spectroscopy (XPS) was performed to determine the surface compositions of the samples with a Thermo Scientific 250Xi spectrometer (Thermo Fisher Scientific). Solid-state NMR experiments were performed with an Agilent DD2 500 MHz (B0=11.7T) spectrometer operating, using the combination of cross-polarization, high-power proton decoupling and magic angle spinning (CP/MAS) method. Elemental analysis was conducted on an Elementar Vario EL CUBE elemental analyzer (Elementar Analysensysteme GmbH, Hanau, Germany). The zeta potential was measured using a Zetasizer NanoZS-90 (Malvern Instruments, Ltd., Malvern, Worcs., UK) at 25 °C. The amount of mercury was quantified by inductively coupled plasma mass spectrometry (ICP-MS) using a PerkinElmer Nex ION 300D ICP-mass spectrometer (PerkinElmer, Waltham, MA, USA).

**Results and discussion**


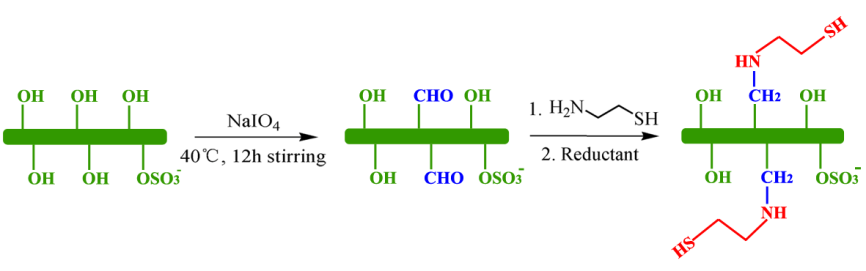


**Scheme S1** Oxidation and reduction reaction of cellulose nanocrystals

**Table S1** Aldehyde content and degree of oxidation of DAC1.84, DAC2.25 and DAC4.05; Percentage of aldehyde group reacted with cysteamine

|  | Aldehyde content  (mmol g-1) | Degree of oxidation  (%) |  | Percentage of aldehyde reaction (%) |
| --- | --- | --- | --- | --- |
| DAC1.84 | 1.84 | 15 | Cys-CNC1.84 | 84 |
| DAC2.25 | 2.25 | 18 | Cys-CNC2.25 | 99 |
| DAC4.05 | 4.05 | 33 | Cys-CNC4.05 | 84 |

**Table S2** Table of XPS data for CNCs

| Orbital | Component | Binding Energy (eV) | Relative  (%) |
| --- | --- | --- | --- |
| C 1s | C-C | 282.9 | 10.7 |
| C-O | 284.6 | 73.1 |
| O-C-O | 286.0 | 16.2 |
|  |  |  |  |
| O 1s | C-O-H | 530.8 | 59.3 |
| O-C-O | 531.3 | 40.7 |
|  |  |  |  |
| S 2p | -SO3H (*j* = 3/2) | 166.9 | 66.6 |
| -SO3H (*j* = 1/2) | 168.1 | 33.4 |

**Table S3** Table of XPS data for Cys-CNCs

| Orbital | Component | Binding Energy (eV) | Relative  (%) |
| --- | --- | --- | --- |
| C 1s | C-C | 283.0 | 9.1 |
| C-O | 284.5 | 74.9 |
| O-C-O | 286.0 | 16.0 |
|  |  |  |  |
| O 1s | C-O-H | 530.8 | 59.7 |
| O-C-O | 531.4 | 40.3 |
|  |  |  |  |
| S 2p | -SH (*j* = 3/2) | 161.5 | 66.8 |
| -SH (*j* = 1/2) | 162.7 | 33.1 |
|  |  |  |
| -SO3H (*j* = 3/2) | 166.6 | 66.8 |
| -SO3H (*j* = 1/2) | 167.8 | 33.2 |
|  |  |  |  |
| N 1s | -NH- | 397.5 | 83.2 |
| -H2- | 400.2 | 16.8 |


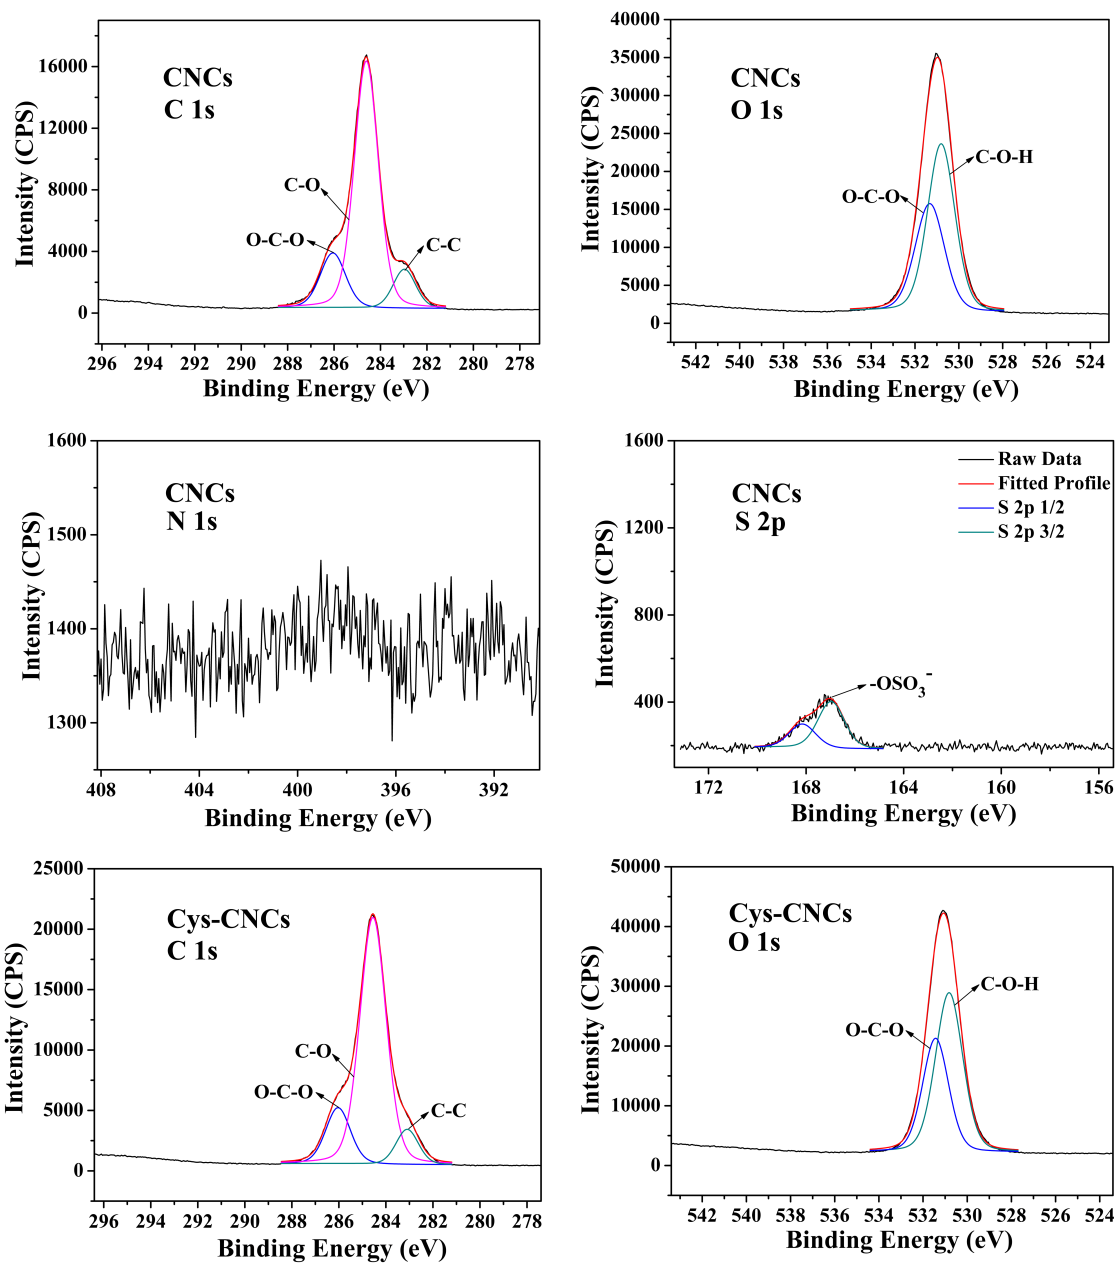


**Fig. S1** C 1s, O 1s, N 1s and S 2p XPS spectrum of CNCs and C 1s and O 1s XPS spectrum of Cys-CNCs


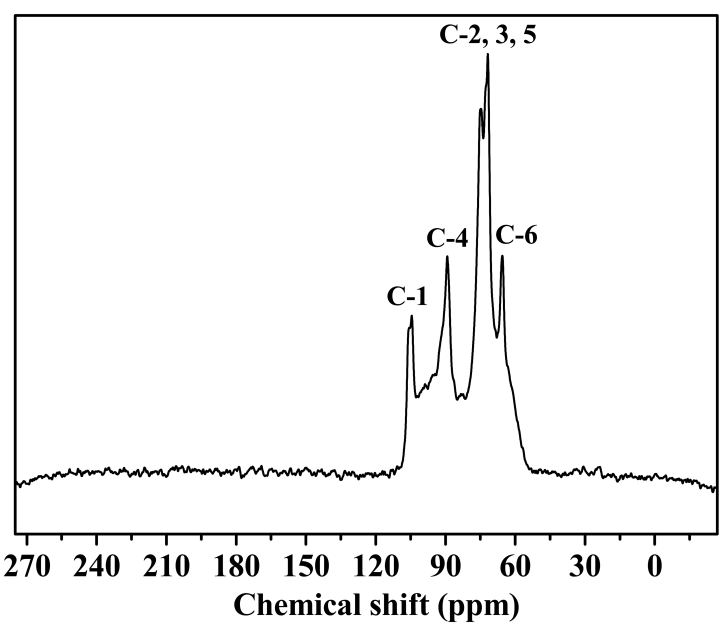


**Fig. S2** 13C CP-MAS NMR spectra of DAC

The contents of carbon (%C), hydrogen (%H), nitrogen (%N) and sulfur (%S) were investigated by elemental analysis. Molar ratio of surface S element and surface N element were calculated by the following equations:

(1)

(2)

(3)

(4)

where N content is the content of surface N element (mmol g-1), and S content is the content of surface S element (mmol g-1); nS/nC and nN/nC are molar ratio of surface S element, surface N element, respectively.

(5)

where I200 is the maximum intensity of the (200) cellulose I reflection, and Iam is the amorphous fraction of cellulose located at 18.0◦.


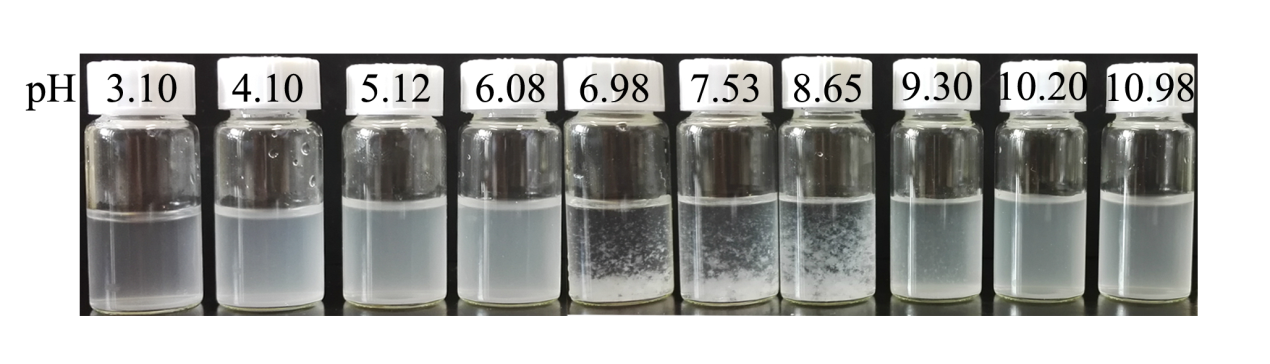


**Fig. S3** The effect of the pH on the dispersion of Cys-CNC4.05

The adsorption mechanism can be explained by studying the adsorption kinetics. Accordingly, the pseudo-first-order model and pseudo-second-order kinetic model (Fig. 5 (b-d)) were applied to explain the adsorption of mercury ions onto Cys-CNCs，and their models were shown as the following equations.

Nonlinear forms of pseudo-first-order: (6)

Linear forms of pseudo-first-order: (7)

Nonlinear forms of pseudo-second-order: (8)

Linear forms of pseudo-second-order: (9)

where Qe and Qt are the adsorption capacity (mg g-1) at equilibrium time and at time t (min), k1 and k2are pseudo-first order rate constant (min-1), and pseudo-second order rate constant (g mg-1 min-1), respectively.

The Langmuir and Freundlich models (Fig. 6 (b-d)) are two well-known isothermal adsorption models, and their models are shown as the following equations.

Nonlinear forms of Langmuir: (10)

Linear forms of Langmuir: (11)

Nonlinear forms of Freundlich: (12)

Linear forms of Freundlich: (13)

where Ce, Qe and Qm are the equilibrium concentration (mg L-1), the equilibrium adsorption capacity of the adsorbent (mg g-1) and the maximum adsorption capacity (mg g-1), respectively. KF and b are the Freundlich and Langmuir constant, and n is the heterogeneity factor.


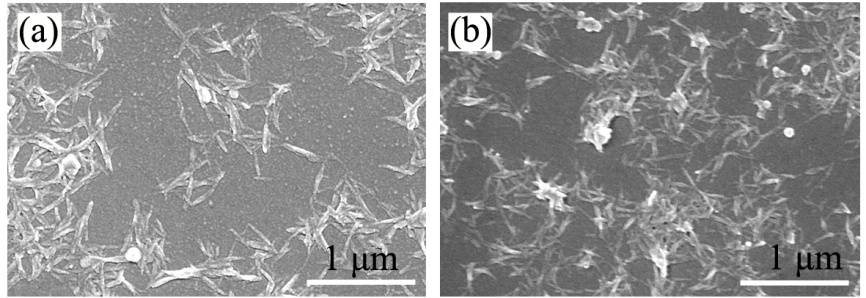


**Fig. S4** SEM images of Cys-CNC1.84 (a), Cys-CNC2.25 (b)


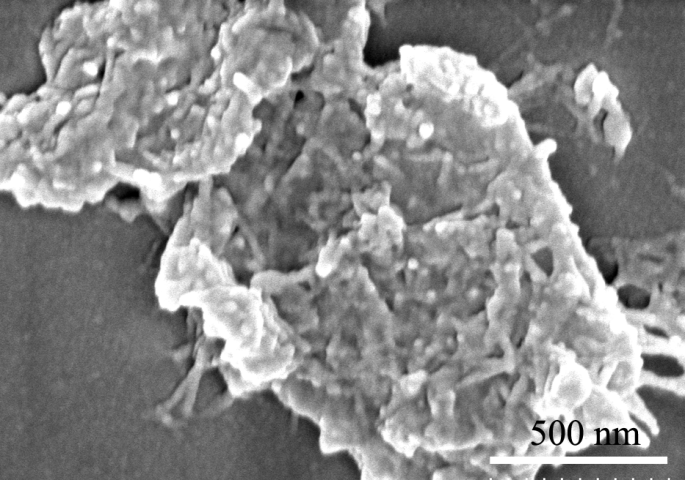


**Fig. S5** SEM images of Cys-CNC4.05


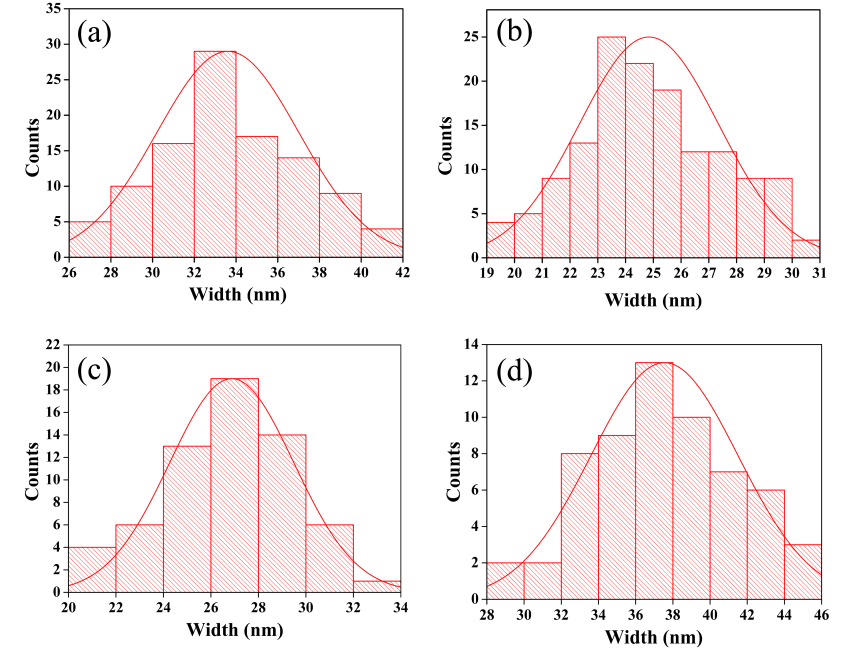


**Fig. S6** Width distribution obtained from the SEM images of CNCs (a), DAC4.05 (b), Cys-CNC4.05 (c), and Hg(II)-loaded Cys-CNC4.05 (d)

**Table S4** Length and width of CNCs, DAC4.05, Cys-CNC4.05, and Hg(II)-loaded Cys-CNC4.05

|  | Width (nm) | Length (nm) |
| --- | --- | --- |
| CNCs | 33±7 | 331±105 |
| DAC4.05 | 24±5 | 195±73 |
| Cys-CNC4.05 | 27±6 | 196±45 |
| Hg(II)-loaded Cys-CNC4.05 | 37±9 | - |


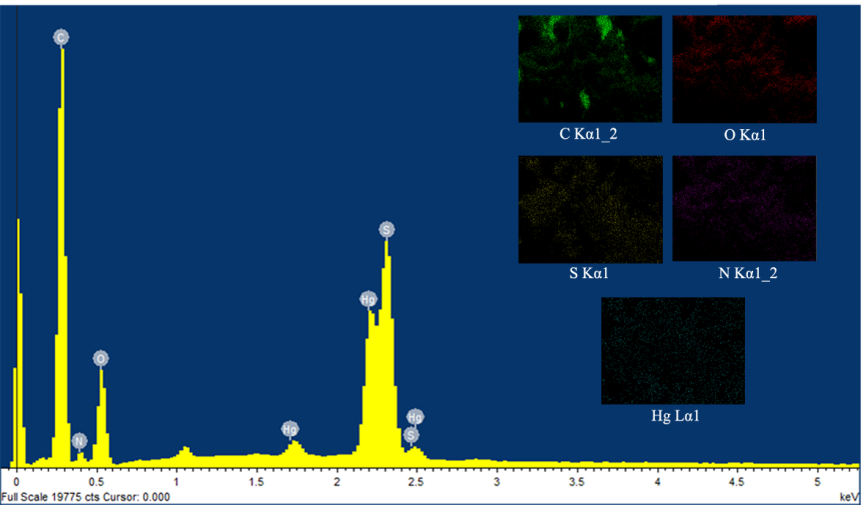


**Fig. S7** EDX spectrum and element mapping of Hg(II)-loaded Cys-CNC4.05. The insets indicate EDX mapping of C, O, S, N and Hg


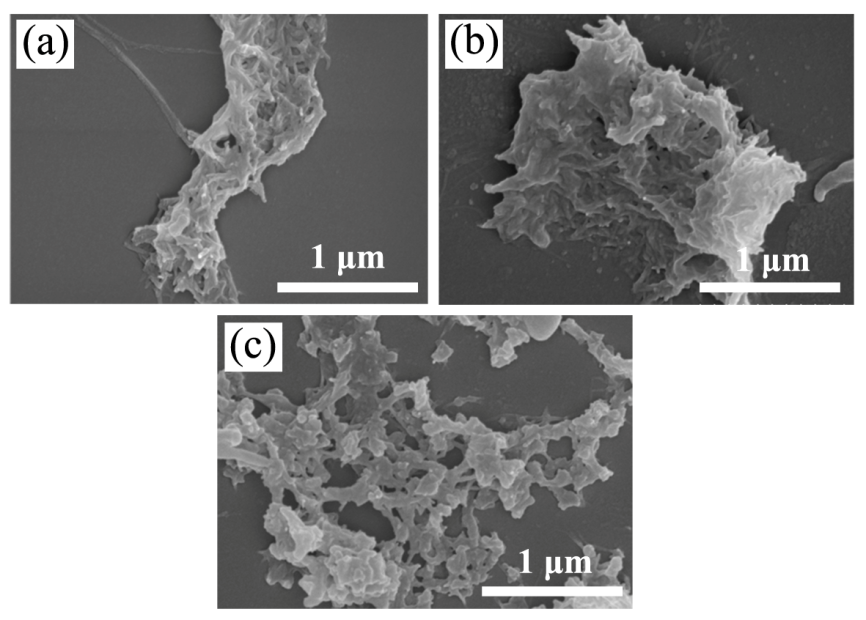


**Fig. S8** SEM images of Cys-CNC1.84 (a), Cys-CNC2.25 (b) and Cys-CNC4.05 after four adsorption-desorption cycles
